# Supplementary material
Source: PubMed Central journal article supplement (PMC5699927)
Supplement: NIHMS908341-supplement-Graphic_Abstract.pdf [file NIHMS908341-supplement-Graphic_Abstract.pdf]

## Carotid Intima-Media Thickness (CIMT)

### Traditional Risk Factors

- Age +
- Systolic Blood Pressure +
- Hemoglobin A1c +

### Whole-body Cholesterol Metabolism

- Fecal Endogenous Cholesterol Excretion
- + Percent Cholesterol Absorption

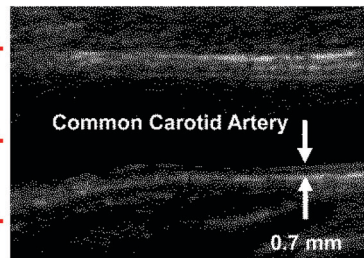

Factors associated with CIMT:

+ : Positive association

- : Negative association
